1 **Questioning the axiom: Is hyperflexed scaphoid a common occurrence in South Indian**  
2 **population? - An observational study**

3  
4 Title  
5

6 1. Name :Dr.Mohamed Nazir ASHIK

7 Position : Resident

8 Department : Department of Orthopedics

9 Affiliation : Sri Ramachandra Institute of Higher Education and Research

10 Institutional address :No 1, Ramachandra Nagar, Sri Ramachandra Nagar,  
11 Chennai, Tamil Nadu, India – 600116

12 2. Name : Dr.Maithreyi SETHU

13 Position : Assistant Professor

14 Department : Department of Hand Surgery

15 Affiliation : Sri Ramachandra Institute of Higher Education and Research

16 Institutional address :No 1, Ramachandra Nagar, Sri Ramachandra Nagar,  
17 Chennai, Tamil Nadu, India – 600116

18

19 3. Name :Dr.Srinivasan RAJAPPA

20 Position : Head of Department

21 Department : Department of Hand Surgery

22 Affiliation : Sri Ramachandra Institute of Higher Education and Research

23 Institutional address :No 1, Ramachandra Nagar, Sri Ramachandra Nagar,  
24 Chennai, Tamil Nadu, India – 600116

25

26 Corresponding Author

27

28 Name : Dr.Maithreyi SETHU

29 Permanent Address : No 19, 6<sup>th</sup> Cross street, Lake area, Nungambakkam, Chennai,

30 Tamil Nadu, India 600034

31 Present Address : No 19, 6<sup>th</sup> Cross street, Lake area, Nungambakkam, Chennai,

32 Tamil Nadu, India 600034

33 E-mail Address : maithreyi.sethu@gmail.com

34 Telephone number : +919786577369

35 Fax Number : -

36

37

38

39

40

41

42

43

44

45

46

47

48

49

50

51

52

53

54

55

56

57

58

59

60

61

62

63

64

65

66

67

68 **Questioning the axiom: Is hyperflexed scaphoid a common occurrence in South Indian**  
69 **population? - An observational study**

70

71 **Abstract**

72 **Background:**

73 Scapholunate angle SLA greater than 80° is one of the indicators of surgery for carpal  
74 instability. The normal SLA is between 30-60°. This is based on studies which were  
75 conducted several decades ago in the western part of the world. The SLA of Indian  
76 population has never been measured before. The knowledge of normal SLA in each  
77 population becomes imperative because it lays down the guidelines for surgical and non-  
78 surgical management of wrist fractures and instability in that population. In this study, we  
79 aim to measure the SLAs in asymptomatic volunteers of South Indian origin and compare the  
80 results with existing data.

81

82 **Methods:**

83 An observational study was done in a tertiary care hospital in South India. Lateral  
84 radiographs of the wrist of asymptomatic volunteers were taken. The SLA was measured  
85 using a software in the PACS system. The relation of SLA to gender, age, left and right sides  
86 and handedness was compared. These were compared to pre-existing global data available  
87 on SLAs.

88

89 **Results :**

90 The SLA of the 202 radiographs with 47 males and 54 females were studied.

- 91
  - The average SLA was 51.33° and the range was between 29° and 74°.

- 92       • The average SLA of males was 51.8° and females 50.8°. There was no significant  
93       difference between the two.
- 94       • Similarly, there was no significant difference between the SLA of right and left sides  
95       in right handed and left handed subgroups.
- 96       • However, there was an increasing trend in SLA among females with age. But no  
97       similar pattern was seen among males.
- 98       • Interestingly, 39 out of the 202 radiographs (19.3%) had a SLA above 60°.

## 99       **Conclusion**

100       This study suggests the normal SLA in South Indians may be higher than the previously  
101       established reference values and serves as a pilot project and a reference for further studies on  
102       SLA.

103

104       Keywords :

105       Scapholunate angle (SLA), Scapholunate dissociation (SLD), carpal angle, scaphoid, lunate

106

107

108       **Questioning the axiom: Is hyperflexed scaphoid a common occurrence in South Indian**  
109       **population? - An observational study**

110

## 111       **INTRODUCTION**

112

113       Anthropometry is the measurement of living human individuals to understand the range of  
114       normal human physical variation.<sup>5</sup> To achieve accurate sex and age determination of normal  
115       values, every population should have its specific measurements.<sup>6</sup> The normal range of the

116 wrist measurements vary with race and ethnicity. The scapholunate angle plays an important  
117 role in the decision making of management of certain carpal bone and scapholunate ligament  
118 injuries. With peri-lunate, wrist and hand injuries accounting for nearly 28% of all injuries<sup>7</sup>, it  
119 is interesting to know what is the normal range of the SLA of different ethnicity.

120 The present study is the first to measure the scapholunate angles (SLA) of healthy South  
121 Indian population. The normal range of scapholunate angle (SLA) is between 30-60°<sup>123</sup>. This  
122 is based on studies which were conducted several decades ago in the western part of the  
123 world. The SLA of Indian population has never been measured before. The knowledge of  
124 normal SLA in each population becomes imperative because it lays down the guidelines for  
125 surgical and non-surgical management of wrist fractures and instability in that population. In  
126 this study, we aim to measure the SLAs in asymptomatic volunteers of South Indian origin  
127 and compare the results with existing data.

128

## 129 **METHODS**

130 A descriptive observational study was conducted in a tertiary care centre in South India  
131 between January 2021 and July 2021. The aim was to measure the SLA in a normal,  
132 asymptomatic South Indian population and analyse any correlation with age, gender, between  
133 right and the left sides and handedness. Statistical analysis using average, standard deviation  
134 and range, significance of correlation of SLA with the different variables were calculated  
135 using the null hypothesis. Institutional ethical clearance was obtained before starting the  
136 study (CSP-MED /21/SEP/71/129). Inclusion criteria were, patients above 20 years but less  
137 than 60 years with no specific complaints in upper limb, who were clinically normal and  
138 healthy volunteers. Excluded were children in whom epiphysis would not have closed,  
139 patients with acute or chronic wrist pain, recent or previous injury to the wrist, hand or  
140 forearm. Congenital conditions affecting the hand or wrist bones, infections and tumours of

141 the hand and those with associated systemic condition causing hypercalcaemia or  
142 hypocalcaemia were also excluded from the study. Standard lateral radiographs of both the  
143 wrists were taken.

144 The scapholunate angle was measured using the software in PACS. These lateral radiographs  
145 were taken in standard *Zero position* with the arm adducted against the trunk, the elbow  
146 flexed  $90^{\circ}$  with the forearm in neutral rotation (no supination or pronation), and the wrist in  
147 neutral position (no radial or ulnar deviation, and no flexion or extension).<sup>9</sup> We attained this  
148 using a below elbow thermoplastic splint as shown in the diagram (Fig 1). It is similar to the  
149 Meyrueis' technique where a wooden board was used to maintain the forearm in a strict  
150 lateral position.<sup>10</sup> Rotational malalignment alters the carpal bone measurements<sup>11</sup> and by  
151 using this easy technique we attained the neutral wrist position. Scapholunate angle was  
152 measured using the software in our PACS (Fig 2). The

153

## 154 **RESULTS**

155 The mean SLA of the 202 lateral radiographs was  $51.3^{\circ}$  with a standard deviation of  $8.87^{\circ}$ ,  
156 ranging between  $29^{\circ}$  to  $74^{\circ}$  degrees. The average SLA of female was  $51.8^{\circ}$  and males  $50.8^{\circ}$   
157 (table 1). There was no significant difference between the two as indicated by the p-value.

158 There was an increasing trend in the average SLA with age (Table 2).

159 **Table 1: SLA Comparison between Males and Females**

|               | <b>Number</b> | <b>Mean</b>     | <b>Mean <math>\pm</math> SD</b> | <b>P value</b> |
|---------------|---------------|-----------------|---------------------------------|----------------|
| <b>Male</b>   | 94            | $50.80^{\circ}$ | $9.29^{\circ}$                  | 0.432          |
| <b>Female</b> | 108           | $51.76^{\circ}$ | $8.39^{\circ}$                  |                |

160 SLA: Scapholunate angle; SD: Standard Deviation

161

162 **Table 2: SLA Distribution in different Sub-groups of Age**

| Age          | Number | Mean   | SD    | Standard error | Range |       |
|--------------|--------|--------|-------|----------------|-------|-------|
|              |        |        |       |                | Min   | Max   |
| <b>20-30</b> | 78     | 49.25° | 8.85° | 1.00           | 29.22 | 65.91 |
| <b>31-40</b> | 54     | 51.21° | 9.42° | 1.28           | 31.81 | 74.43 |
| <b>41-50</b> | 42     | 53.23° | 8.07° | 1.24           | 31.58 | 66.89 |
| <b>≥ 51</b>  | 28     | 54.52° | 7.29° | 1.37           | 41.05 | 68.25 |
| <b>Total</b> | 202    | 51.33° | 8.81° | 0.62           | 29.22 | 74.43 |

163 SLA: Scapholunate angle; SD: Standard Deviation; Min: Minimum; Max: Maximum

164

165 On further investigation it was found that women in the 20-30 years sub-group had a  
 166 statistically significantly lower mean SLA when compared to the 40-50 years and above 50  
 167 years sub-group (table 3). The SLA between the intermediary age groups in the females  
 168 showed a gradual increase but this was not statistically significant (Fig 3). In case of men,  
 169 there was no statistical correlation between SLA and age.

170 **Table 3: Significance of SLA to Increasing Age in Males and Females**

| Male  | Age   |       | Significance (p value) |
|-------|-------|-------|------------------------|
|       | 20-30 | 31-40 | 0.08                   |
| 41-50 |       | 0.38  |                        |
| ≥51   |       | 0.09  |                        |
| 31-40 | 20-30 | 0.08  |                        |
|       | 41-50 | 0.53  |                        |

|               |       |                     |                    |
|---------------|-------|---------------------|--------------------|
| <b>Female</b> |       | ≥51                 | 0.86               |
|               | 41-50 | 20-30               | 0.38               |
|               |       | 31-40               | 0.53               |
|               |       | ≥51                 | 0.47               |
|               | ≥51   | 20-30               | 0.91               |
|               |       | 31-40               | 0.86               |
|               |       | 41-50               | 0.47               |
|               | 20-30 | 31-40               | 0.87               |
|               |       | <b><u>41-50</u></b> | <b><u>0.04</u></b> |
|               |       | <b><u>≥51</u></b>   | <b><u>0.04</u></b> |
|               | 31-40 | 20-30               | 0.87               |
|               |       | <b><u>41-50</u></b> | <b><u>0.05</u></b> |
|               |       | <b><u>≥51</u></b>   | <b><u>0.05</u></b> |
|               | 41-50 | 20-30               | 0.49               |
|               |       | 31-40               | 0.53               |
|               |       | ≥51                 | 0.77               |
|               | ≥51   | <b><u>20-30</u></b> | <b><u>0.04</u></b> |
|               |       | <b><u>31-40</u></b> | <b><u>0.05</u></b> |
|               |       | 41-50               | 0.77               |

171 SLA: Scapholunate angle

172

173

174 **Variations among sides and dominance:**



175 101 sets of right and left sided wrist radiographs were compared without taking gender or  
176 handedness into consideration. When SLA was compared, gender difference was not  
177 statistically significant (table 4). Neither was handedness (table 5).

178

179 **Table 4: Difference of SLA in Right and Left side**

|              | Number | Mean             | Mean $\pm$ SD   | P value   |
|--------------|--------|------------------|-----------------|-----------|
| <b>Right</b> | 101    | 50.81 $^{\circ}$ | 8.88 $^{\circ}$ | P = 0.245 |
| <b>Left</b>  | 101    | 51.85 $^{\circ}$ | 8.76 $^{\circ}$ |           |

180

181 SLA: Scapholunate angle; SD: Standard Deviation

182

183 **Table 5: Difference in SLA with Handedness**

|                            | Number | Mean             | Mean $\pm$ SD   | P value   |
|----------------------------|--------|------------------|-----------------|-----------|
| <b>Dominant hand</b>       | 101    | 50.73 $^{\circ}$ | 8.86 $^{\circ}$ | P = 0.180 |
| <b>Non – Dominant hand</b> | 101    | 51.93 $^{\circ}$ | 8.76 $^{\circ}$ |           |

184 SLA: Scapholunate angle; SD: Standard Deviation

185

186

187

## 188 **DISCUSSION**

189 The scapholunate angle reflects the conditions of scapholunate junction and is used to  
190 evaluate carpal bone alignment on lateral radiographs.<sup>12</sup> On comparing the data of this study

191 with the other international literature available, the mean and range of SLA was in  
192 concurrence with study by Sarrafian et al, Larsen et al, Jafari et al. But the range was much  
193 narrower in the data by Linscheid et al, Schuid et al and Tang et al when compared to our  
194 study (Table 6).

195 **Table 6: Comparison of SLA among Different Studies**

|                                  | SLA<br>Average       | SLA Range                  |
|----------------------------------|----------------------|----------------------------|
| S.Indian                         | 51.3°                | 29°-74°                    |
| Linscheid et al <sup>12</sup>    | 46°                  | 30°-60°                    |
| Sarrafian et al <sup>12</sup>    | 51°                  | 28°-101°                   |
| Larsen et al <sup>9, 13</sup>    | 50°                  | -                          |
| Schuid et al <sup>14</sup>       | 45.8°(M)<br>48.4°(F) | 40.1°-51.5°<br>40.3°-56.5° |
| Jafari et al, Iran <sup>15</sup> | 51.8°                | 30°-80°                    |
| Tang et al, China <sup>16</sup>  | 54.7°                | 48.2°-61.2°                |

196 SLA: Scapholunate angle; S: South

197

198 There was no significant difference in the average SLA between males and females in any of  
199 these studies (Table 7) but the range was much narrower in the data published by Schuhl et  
200 al. Again, there was no significant difference in the SLA based on the handedness as  
201 compared with the other articles (Table8).

202 **Table 7: Comparison of SLA in Genders among the Different Studies**

|                                  | Male (Mean ± SD)                                                | Female (Mean ± SD) |
|----------------------------------|-----------------------------------------------------------------|--------------------|
| S.Indian (This study)            | 50.8° ± 9.29°                                                   | 51.76° ± 8.39°     |
| Schuind et al <sup>14</sup>      | 45.8° ± 5.7°                                                    | 48.4° ± 8.1°       |
| Schuhl et al <sup>10</sup>       | 25.52°-43.32°                                                   | 29.2°-49.9°        |
| Jafari et al, Iran <sup>15</sup> | 52.4° ± 8.5°                                                    | 51.5° ± 8.4°       |
| Tang et al, China <sup>16</sup>  | There was no significant difference in the SL angle (p = 0.48), |                    |

203 SLA: Scapholunate angle; SD: Standard Deviation; S: South

204

205 **Table 8: Comparison of SLA with Handedness**

|                                   | Dominant              | Non-Dominant          |
|-----------------------------------|-----------------------|-----------------------|
| S. Indian (This study)            | 50.58° +52.8°         | -                     |
| Schuind et al <sup>14</sup>       | 47.2° ± 6.5°          | 46.6° ± 6.9°          |
| Schuhl et al <sup>10</sup> , Male | 32.8° ± 7.2° (23-51)  | 36° ± 7.3° (22-48)    |
| Female                            | 39.5° ± 10.3° (17-55) | 39.3° ± 10.6° (11-84) |

206 SLA: Scapholunate angle; S: South

207

208 On comparing the SLA with age, there was no significance association in the study by

209 Schuind et al<sup>13</sup> and Jafari et al, Iran<sup>14</sup> as with the present study (table 9). But an incidental

210 finding in this study was that in case of females, the older women(>40years) had a  
 211 significantly wider SLA than younger women(20-30years). This was not the same case with  
 212 men. Another interestingly finding in this study was that 39 out of the 202 (19%) radiographs  
 213 had SLA more than 60<sup>0</sup> which is considered as the normal upper limit. It ranged from 61<sup>0</sup> to  
 214 74<sup>0</sup>. All of the 39 subjects were asymptomatic and none of them had an increased  
 215 scapholunate gap. These interesting observations need further research and evaluation. It is  
 216 beyond the scope of this paper to explore the reason behind it, but it definitely sparks a  
 217 question of possibility if it is a common occurrence in many populations which has been  
 218 missed so long.

219 **Table 9: Comparison of SLA with Age**

|                                  | Younger Age                                | Older Age                | Significance |
|----------------------------------|--------------------------------------------|--------------------------|--------------|
| S.Indian (This study)            | 49.25° ± 8.85°                             | 54.52° ± 7.29°           | 0.006        |
| Schuind et al <sup>14</sup>      | 50.5° ± 6.2°                               | 43.7° ± 6.2°             | 0.001        |
| Jafari et al, Iran <sup>15</sup> | 51.1° ± 8.8° (20-40yrs)                    | 52.4° ± 8.0° (40-60 yrs) | NS           |
| Tang et al, China <sup>16</sup>  | SL angle did not change with patient's age |                          |              |

220 SLA: Scapholunate angle; S: South; NS; Not significant

221

222 Limitation of the study

223 Further research on SLA is needed in many parts of the world to establish a wide consensus.

224 The follow-up of the individuals especially those with a higher SLA might prove useful, to

225 observe if they are more prone to Scaphotrapeziotrapizoidal (STT) arthritis in the later part of

226 their lives. The significant increase of the SLA in female with age might also be a normal  
227 occurrence which has been unnoticed. But again, this needs to be addressed and confirmed  
228 with a multicentric study.

229

## 230 Conclusion

231 This research paper serves as a pilot study and as a reference for further studies on SL angle  
232 in Indians. Though it is in concurrence with the previous articles on SLA, pertaining to the  
233 range, average and relation to age sex and handedness, it points out that further research and  
234 multicentric studies might be needed to redefine the normal range of SLA. The association of  
235 higher SLA with STT arthritis and the significant increase in SLA with age in women require  
236 long term cohort studies. The study might also influence designing of implants of carpal  
237 bones in the future.

238

## 239 Acknowledgements

240 Dr.T.Gayathri, Senior Lecturer in Statistics, Department of Allied Health Sciences, Sri  
241 Ramachandra Institute of higher Education and Research, Chennai, India

242

## 243 Conflict of Interest

244 None

245

## 246 Funding

247 This research did not receive any specific grant from funding agencies in the public,  
248 commercial or not-for-profit sectors

249

250 Written informed consent was obtained from all the volunteers of this study. None of their  
251 identities were revealed in the study

252

### 253 **Institutional Ethical Commiittee Approval**

254 This study was approved by the Institutional Ethics Committee (CSP-MED /21/SEP/71/129).

255

256 CRediT author statement

257 Dr.Mohamed Nazir ASHIK: Software, Investigation, Resources, Data Curation, Project  
258 administration

259 Dr.Maithreyi SETHU : Methodology, Software, Validation, Formal analysis, Data Curation,  
260 Writing – Original, Writing - Review & Editing

261 Dr.Srinivasan RAJAPPA : Conceptualization, Resources, Visualization, Supervision

262

263

264

### 265 **References**

- 266 1. Linscheid RL, Dobyns JH, Beabout JW, Bryan RS. Traumatic Instability of the Wrist. *The Journal*  
267 *of Bone & Joint Surgery*. 1972;54(8):1612-1632.
- 268 2. Goldfarb CA, Yin Y, Gilula LA, Fisher AJ, Boyer MI. Wrist Fractures: What the Clinician Wants  
269 to Know. *Radiology*. 2001;219:11-28.
- 270 3. Gilula LA, Weeks PM. Post-traumatic Ligamentous Instabilities of the Wrist 1. *Radiology*.  
271 1978;129(3):641-651.

- 272 4. Smith D, Gilula Louis, Amadio P. Dorsal Lunate Tilt (DISI Configuration): Sign of Scaphoid  
273 Fracture Displacement'. *Radiology*. 1990;176(2):497-499.
- 274 5. Mohammed Ali MH. A normal data-base of posteroanterior radiographic measurements of  
275 the wrist in healthy Egyptians. *Surgical and Radiologic Anatomy*. 2009;31(9):665-674.  
276 doi:10.1007/s00276-009-0500-4
- 277 6. Franklin D, Freedman L, Milne N. Sexual dimorphism and discriminant function sexing in  
278 indigenous South African crania. *HOMO- Journal of Comparative Human Biology*.  
279 2005;55(3):213-228. doi:10.1016/j.jchb.2004.08.001
- 280 7. Angermann P, Lohmann M. *INJURIES TO THE HAND AND WRIST. A STUDY OF 50,272 INJURIES*.
- 281 8. Koh KH, Lee HI, Lim KS, Seo JS, Park MJ. Effect of wrist position on the measurement of carpal  
282 indices on the lateral radiograph. *Journal of Hand Surgery: European Volume*. 2013;38(5):530-  
283 541. doi:10.1177/1753193412468543
- 284 9. Larsen CF, Stigsby B, Mathiesen FK, Lindequist S. Radiography of the wrist: A new device for  
285 standardized radiographs. *Acta Radiologica*. 1990;31(5):459-462.  
286 doi:10.1080/02841859009173073
- 287 10. Schuhl J, Leroy B, Comtet J, -- CJ. *I TUDE RAD.I.OLOGIQUE DE LA MOBILITE RELATIVE DU*  
288 *SCAPHOIDE ET DU SEMI-LUNAIRE RADIOLOGICAL STUDY OF THE MOBILITY OF THE SCAPHO-*  
289 *LUNATE JOINT*. Vol 4.; 1985.
- 290 11. Capo JT, Accousti K, Jacob G, Tan V. The effect of rotational malalignment on X-rays of the  
291 wrist. *Journal of Hand Surgery: European Volume*. 2009;34(2):166-172.  
292 doi:10.1177/1753193408090393
- 293 12. Nakamura R, Hori M, Imamura T, Horii E, Miura T. *Method for Measurement and Evaluation*  
294 *of Carpal Bone Angles*.; 1989.
- 295 13. Schuind F, Alemzadeh S, Stallenberg B, Burny F. *Does the Normal Contralateral Wrist Provide*  
296 *the Best Reference for X-Ray Film Measurements of the Pathologic Wrist?*
- 297 14. Jafari D, Taheri H, Shariatzade H, Najd Mazhar F, Jalili A, Ghahramani M. *Radiographic Indices*  
298 *in One Hundred Fifty Normal Iranian Wrists*. Vol 26.; 2012.
- 299

### 300 Figure Legends

301 Fig 1: Thermoplastic splint aiding in keeping the wrist in neutral position during the  
302 radiograph

303

304 Fig 2: Scapholunate angle subtended between the longitudinal lunate axis and the axis of the  
305 scaphoid attained by the tangential method.

306

307 Fig 3: Mean SLA of females in different age group

308

309

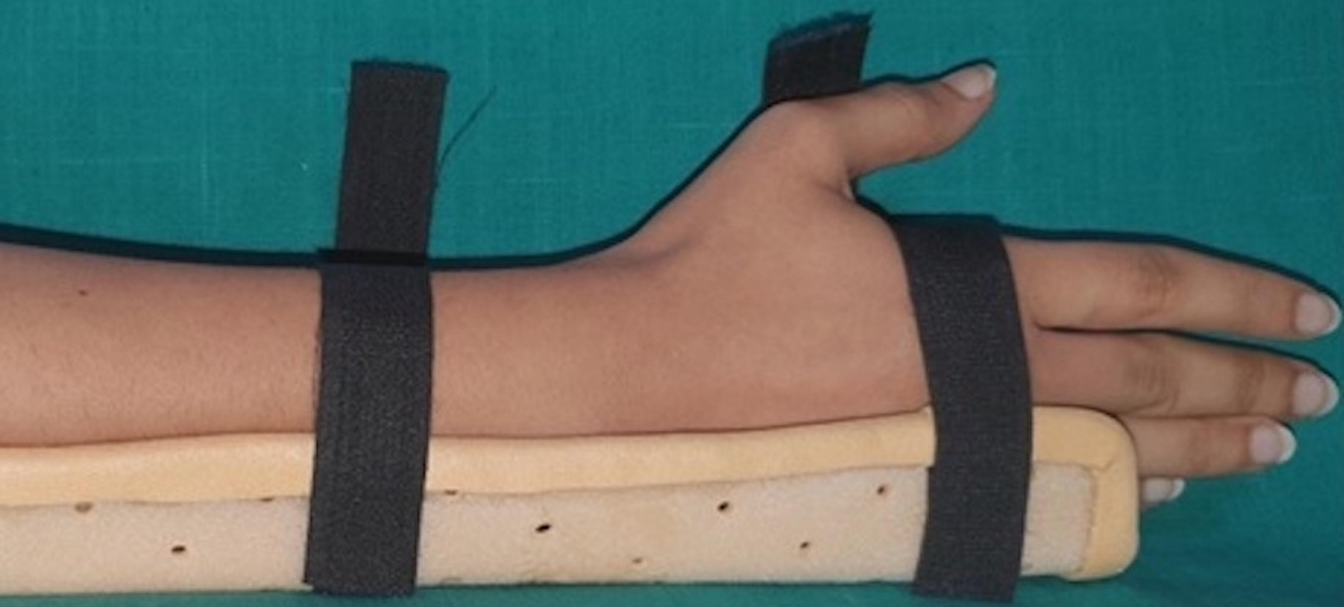



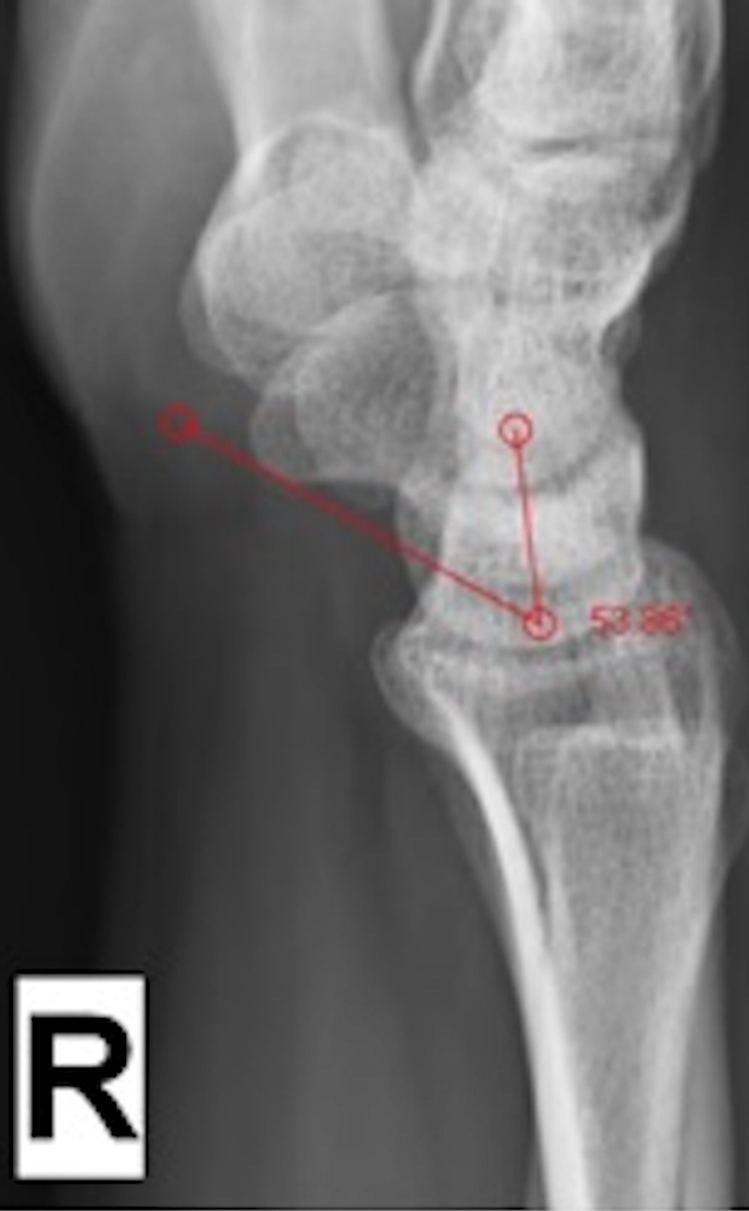

**R**

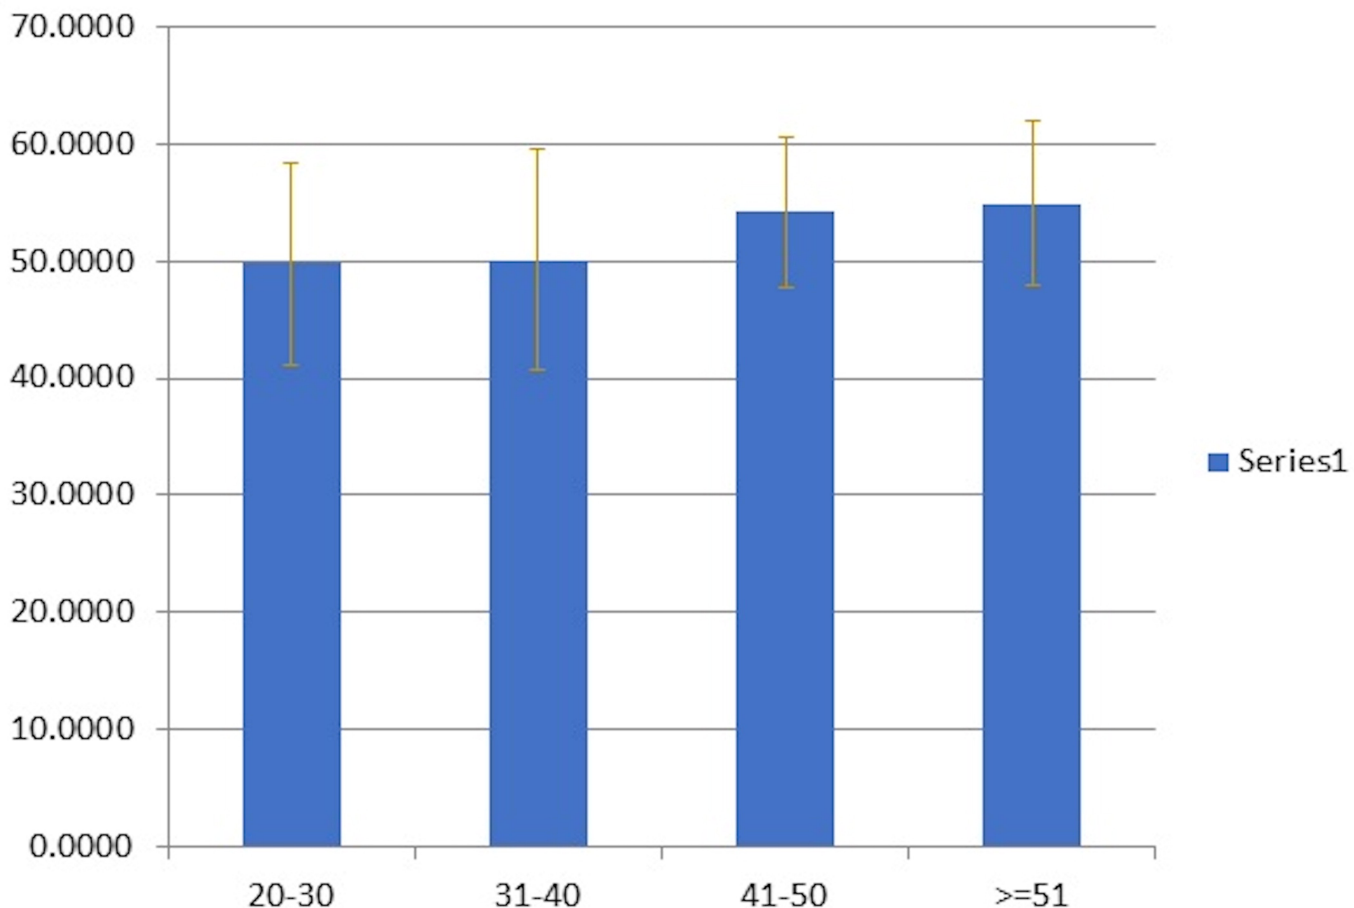

Source: https://www.medrxiv.org/content/10.1101/2022.05.14.22275085.full.pdf
